# Supplementary material for: Acrylic acid grafted porous polycarbonate membrane with smart hydrostatic pressure response to pH
Source: Royal Society of Chemistry journal article supplement (doi:10.1039/c3ta10229g), 2013-01-01
Supplement: c3ta10229g.pdf [file c3ta10229g.pdf]

## Supporting Information

### Acrylic acid grafted porous polycarbonate membrane with smart hydrostatic pressure response to pH

Jing Wu<sup>a</sup>, Nü Wang<sup>a</sup>, Huacheng Zhang<sup>b</sup>, Li Wang<sup>b</sup>, Hua Dong<sup>b</sup>, Yong Zhao,<sup>\*a</sup>  
and Lei Jiang<sup>a,b</sup>

<sup>a</sup> Key Laboratory of Bio-Inspired Smart Interfacial Science and Technology of Ministry of Education, School of Chemistry and Environment, Beihang University, Beijing 100191, P. R. China.

<sup>b</sup>Beijing National Laboratory for Molecular Sciences (BNLMS), Key Laboratory of Organic Solids, Institute of Chemistry Chinese Academy of Sciences, Beijing 100190, P. R. China.

**S1.** The XPS full-spectra of pristine polycarbonate (PC) membrane. Binding energies about 284.79 eV and 533.76 eV respond to the C 1s and O 1s of pristine PC membrane.

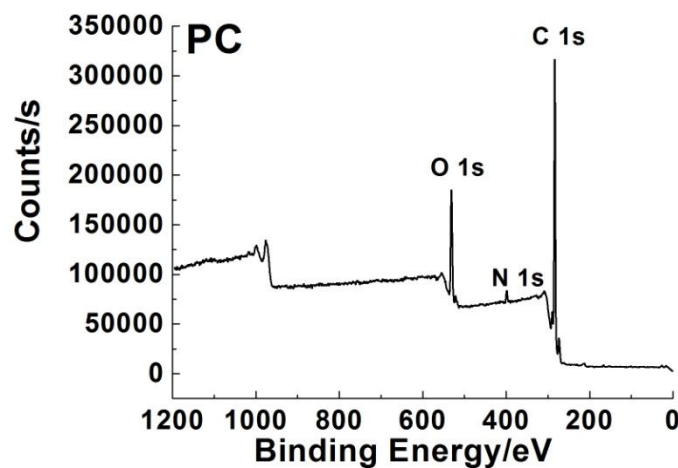

**Fig. S1** XPS full-spectra of pristine PC membrane.

**S2.** The XPS full-spectra of poly (acrylic acid) grafted PC membrane (PAA-g-PC). The binding energy peaks which are stated at 284.74 eV and 532.25 eV represent C 1s and O 1s of PAA-g-PC.

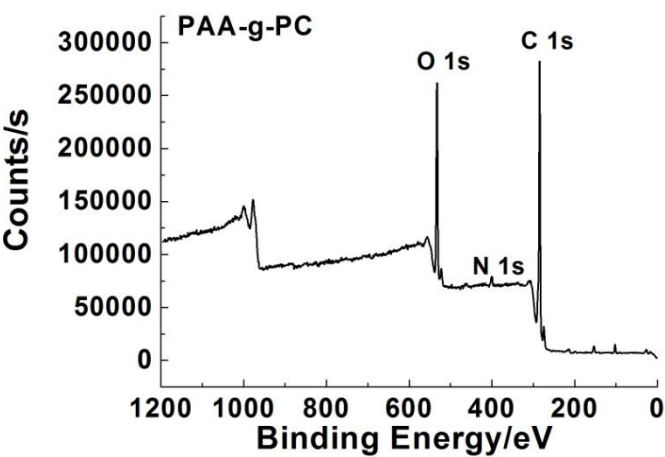

**Fig. S2** XPS full-spectra of PAA-g-PC membrane.
